# Supplementary material
Source: PubMed Central journal article supplement (PMC4054220)
Supplement: AEM.00759-14_zam999105442so1.pdf [file AEM.00759-14_zam999105442so1.pdf]

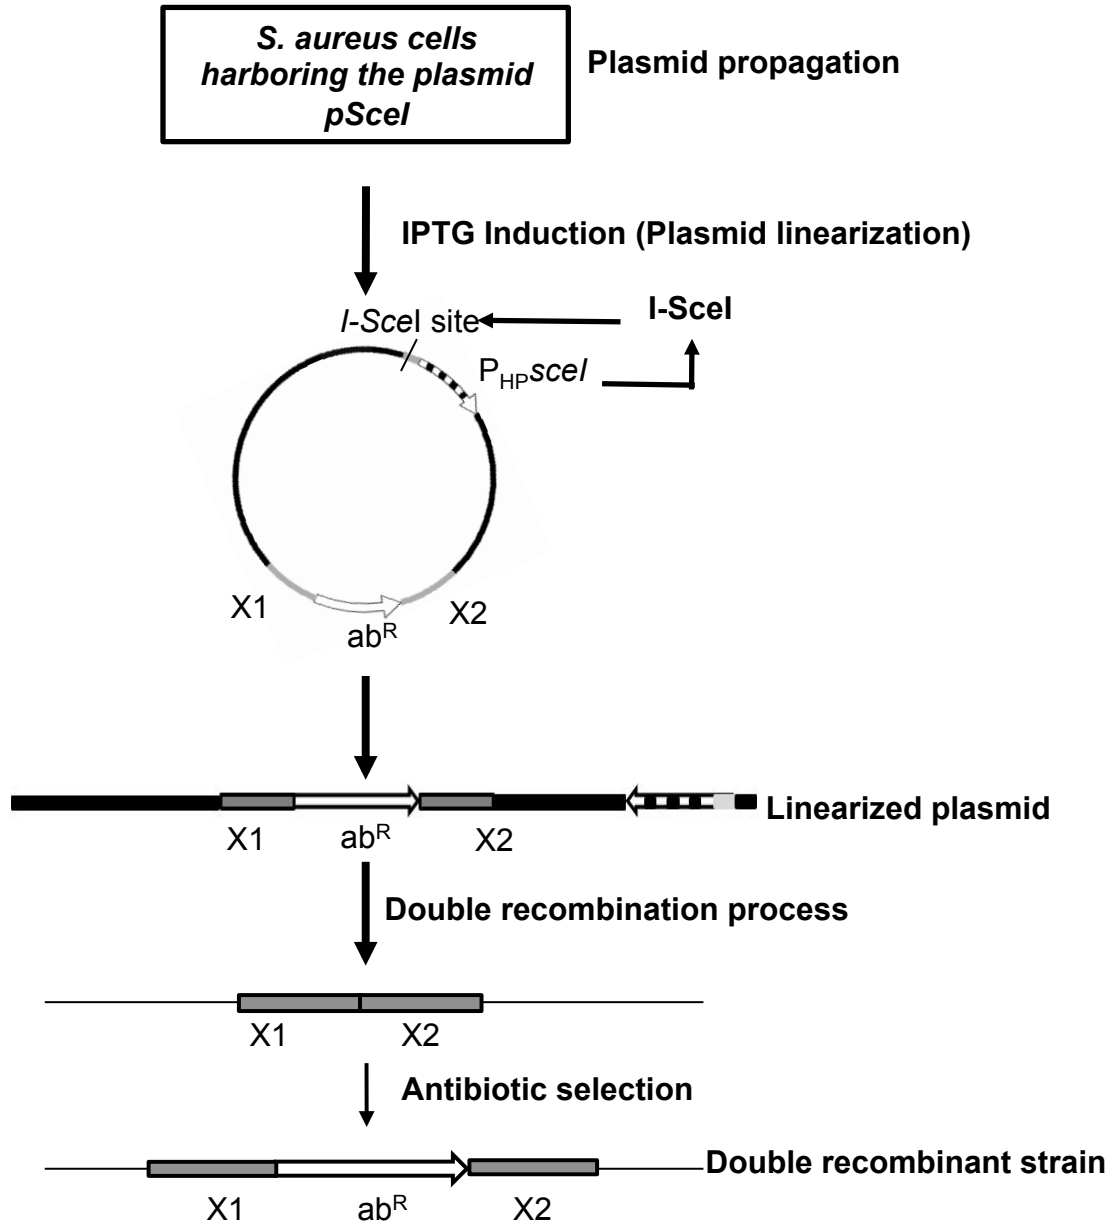

**Figure S1: Generation of deletion mutants in *S. aureus* in a single step, double-recombination event.** The plasmid *pScel* carrying the deletion cassette is propagated in *S. aureus* and linearized by adding IPTG to the culture. The addition of IPTG triggers the expression of *I-SceI* enzyme, which recognizes a unique restriction site *I-SceI* in the backbone of the plasmid. The double recombination event delete the gene of interest and confers to the resultant strain the antibiotic resistance necessary to grow in selective media. False positives colonies harboring circular plasmid can be easily distinguished from the knock-out mutants because the plasmid harbors the gene  $\beta$ -*galB* gene thus colonies turn blue in the presence of X-gal.

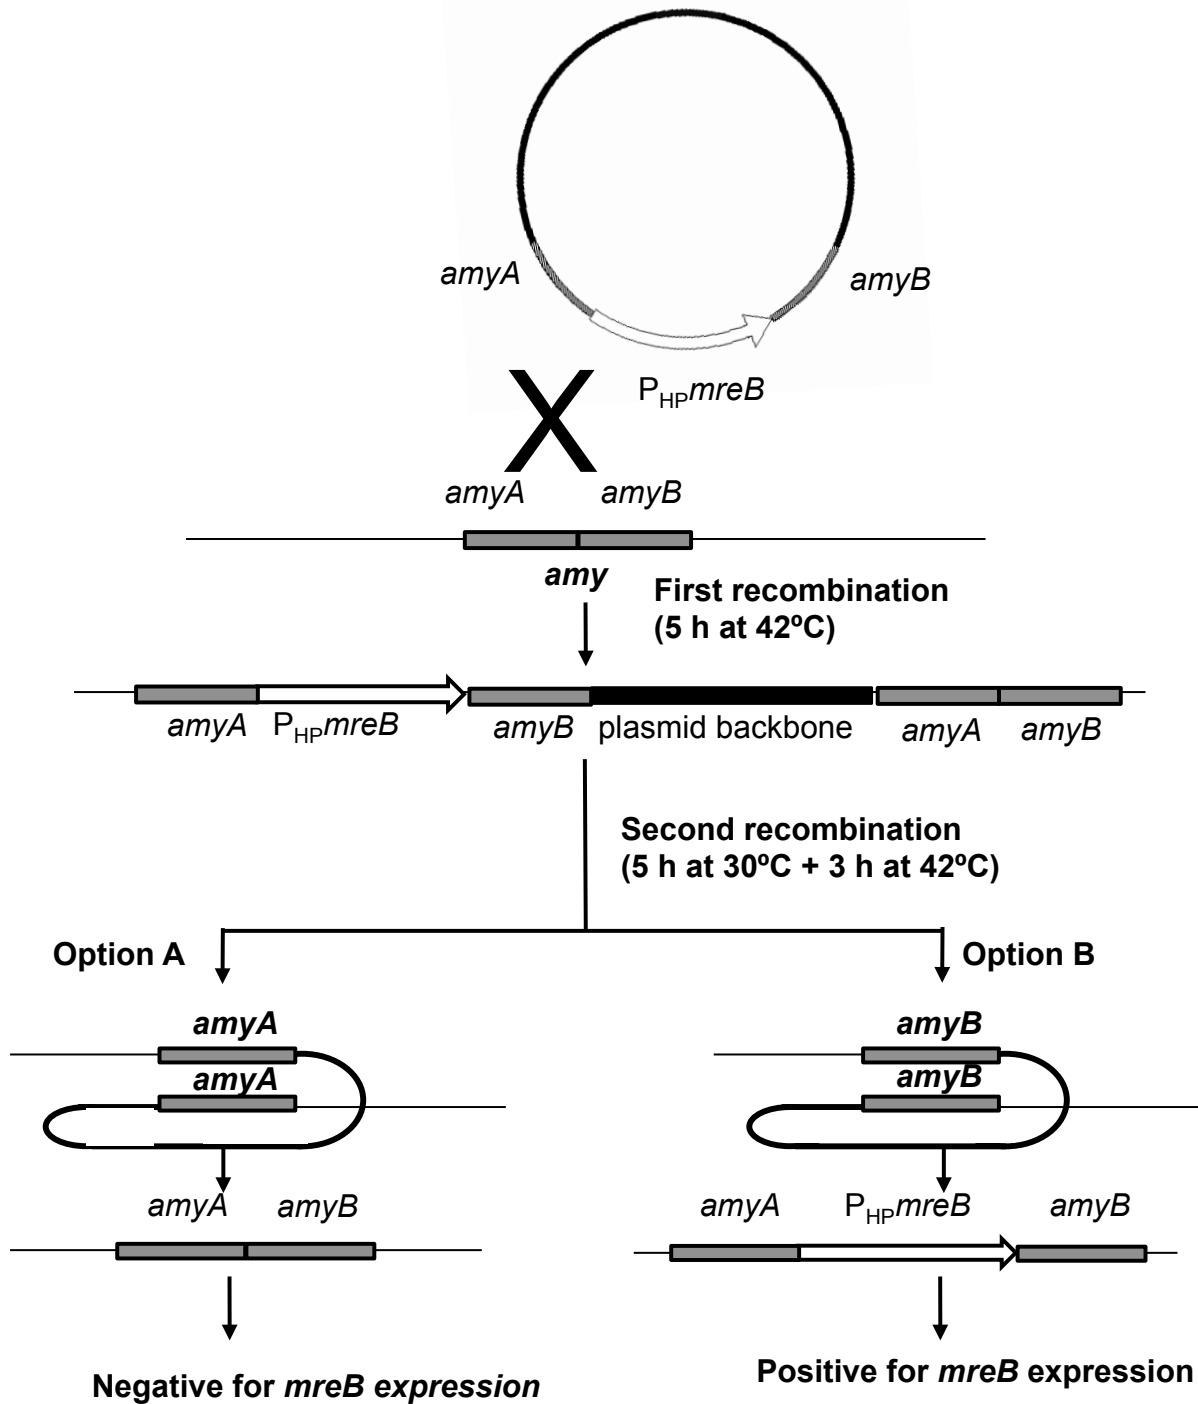

**Figure S2: Insertion of *mreB* gene of *B. subtilis* into the neutral locus *amy* of *S. aureus*.** pAmy plasmid inserted its cargo into the neutral locus *amy* via two sequential processes of recombination. The resultant colonies that went through two recombination steps did not express the  $\beta$ -*gaB* and *ermC* genes placed in the backbone of the plasmid. Those colonies were sensitive to erythromycin and not blue in the presence of X-gal. The process of sequential recombination generated two different genetic backgrounds. One type of colonies had restored the native *amy* locus (option A) while another type of colonies had disrupted the *amy* locus and incorporated the cargo (option B). PCR validation of the resultant colonies is necessary to discard option A.

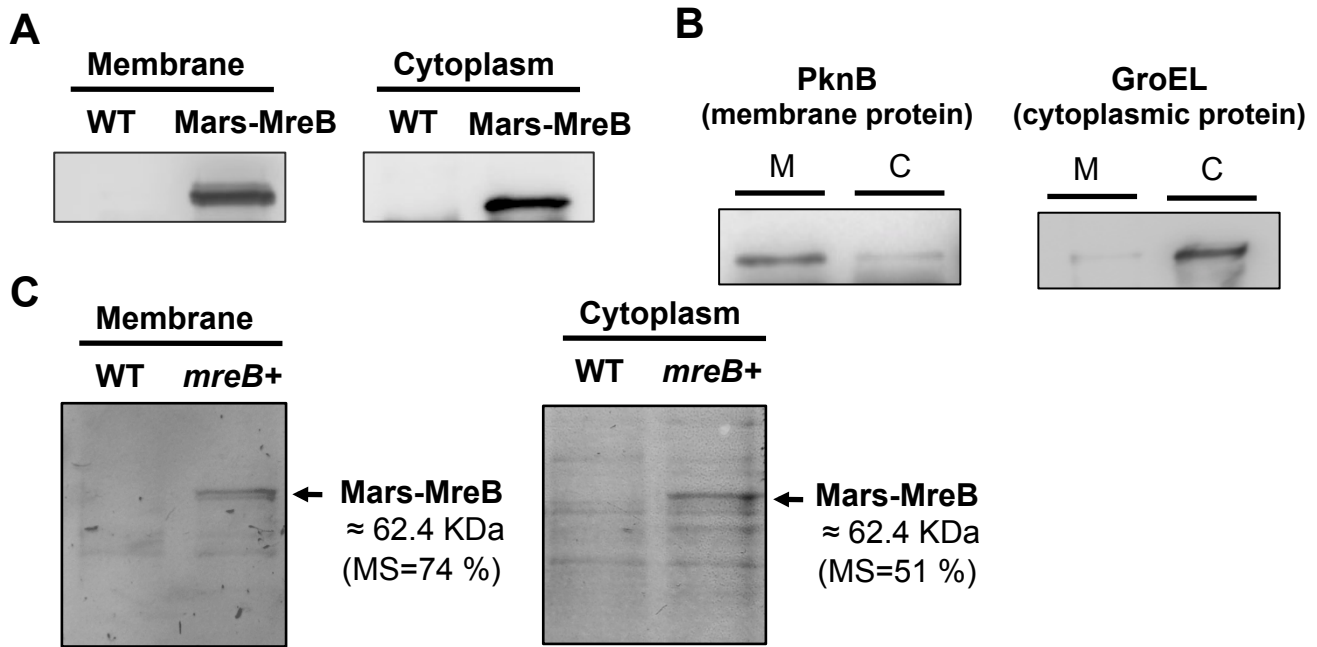

**Figure S3: Subcellular localization of MreB** (A) Detection of Mars-MreB in membrane (left) and cytoplasmic (right) fractions by western blot analysis, using antibodies against Mars protein. (B) Controls of cross contamination of the membrane fraction (M) and the cytoplasmic fraction (C). The Detection of the membrane-bound histidine-kinase PknB was used as membrane marker and the cytoplasmic-associated chaperone GroEL was used as cytoplasmic marker. (C) Purification of MreB from the membrane and cytoplasmic associated protein fraction and identification by mass spectrometry analysis. Identification coverage is shown in brackets (MS).

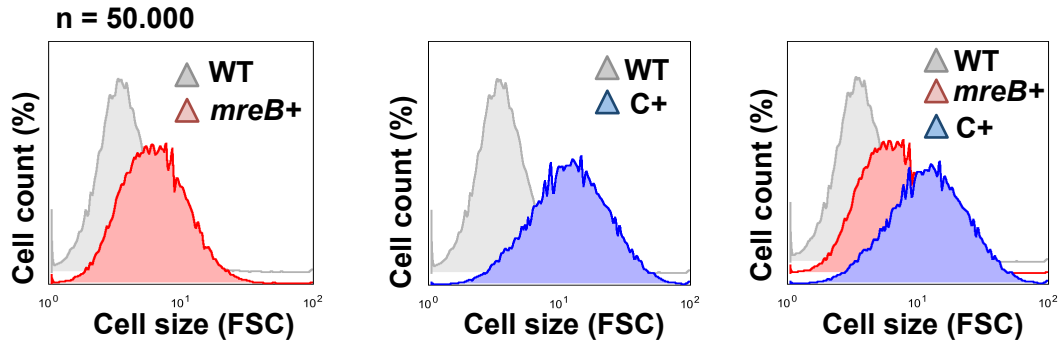

**Figure S4:** Flow cytometry analysis to monitor the diameter of 50,000 cells selected from wild type (grey profile) and *mreB*<sup>+</sup> strains (red profile). Positive control of cell size is *B. subtilis* cells (blue profile). Cell size was monitored using forward light scatter detection (FSC). Notice that FSC values are in logarithmic scale.

**A**

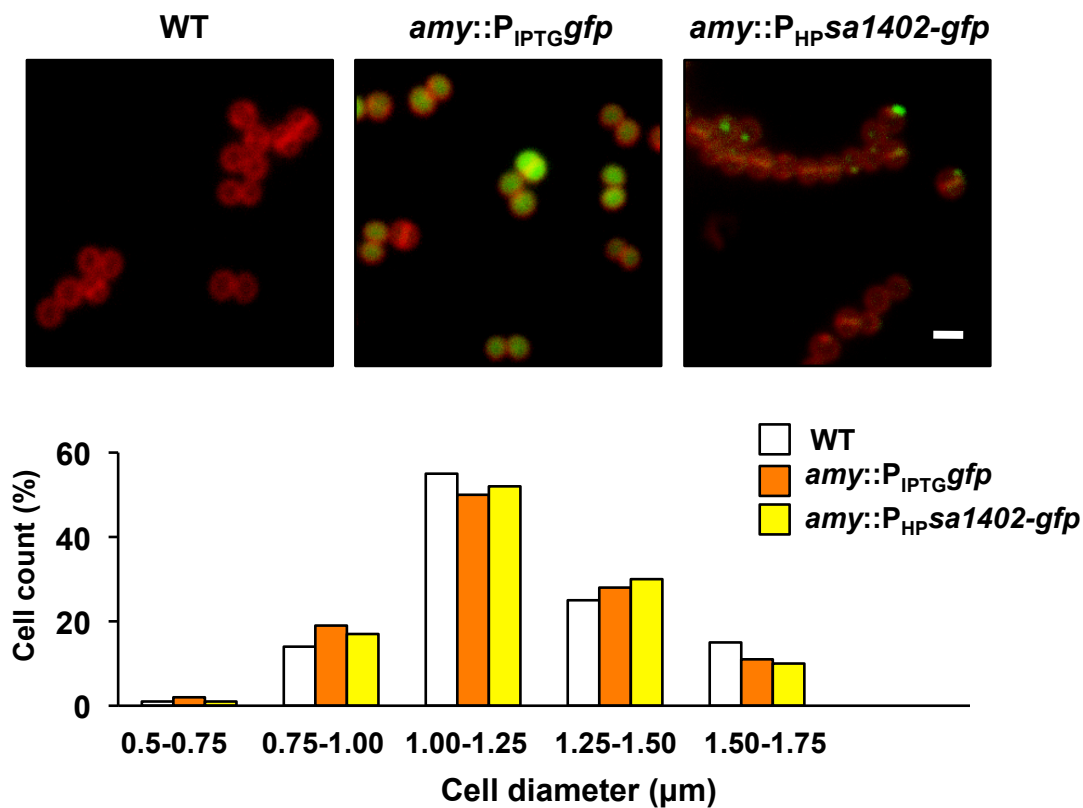

**B**

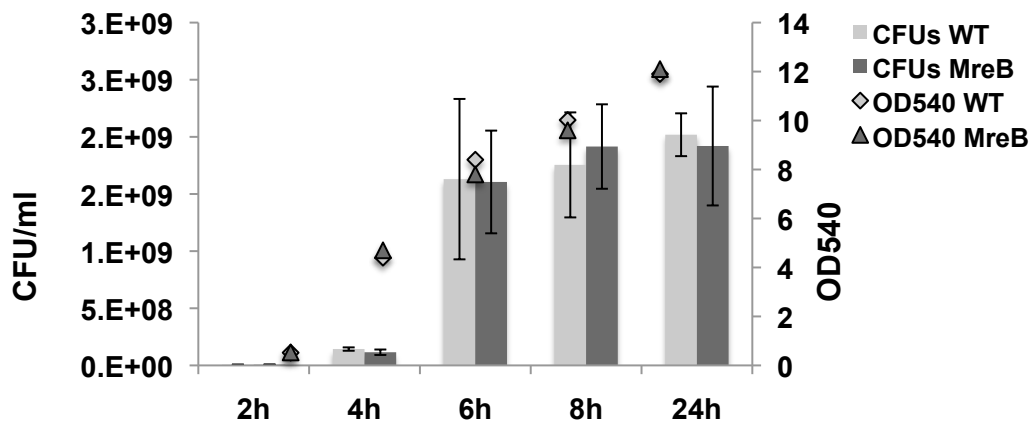

**Figure S5: (A) Production of proteins different from MreB does not affect the cell size of *S. aureus*.** Fluorescence microscopy pictures of wild-type cells (left panel), cells producing a cytoplasmic GFP (center panel) and a GFP fused to a membrane-associated protein that oligomerizes in the membrane of *S. aureus* cells (SA1402 protein) (right panel). Cells membrane was stained with Nile Red (false coloured in red). Scale bar is 2 μm. Quantitative cell size assay in wild-type and strains expressing a cytoplasmic GFP (orange bars) and GFP fused to a membrane-associated protein (yellow bars) are shown below. N=500. **(B) *mreB*-expressing cells exhibit similar growth rate than wild-type cells.** Quantification of growth rate of different *S. aureus* strains. Cell growth was monitored by counting colony forming units (CFU) (left Y axis) simultaneously to measuring OD<sub>540</sub> (right Y axis). Cells were grown in TSB medium at 37°C during 24h (X axis).

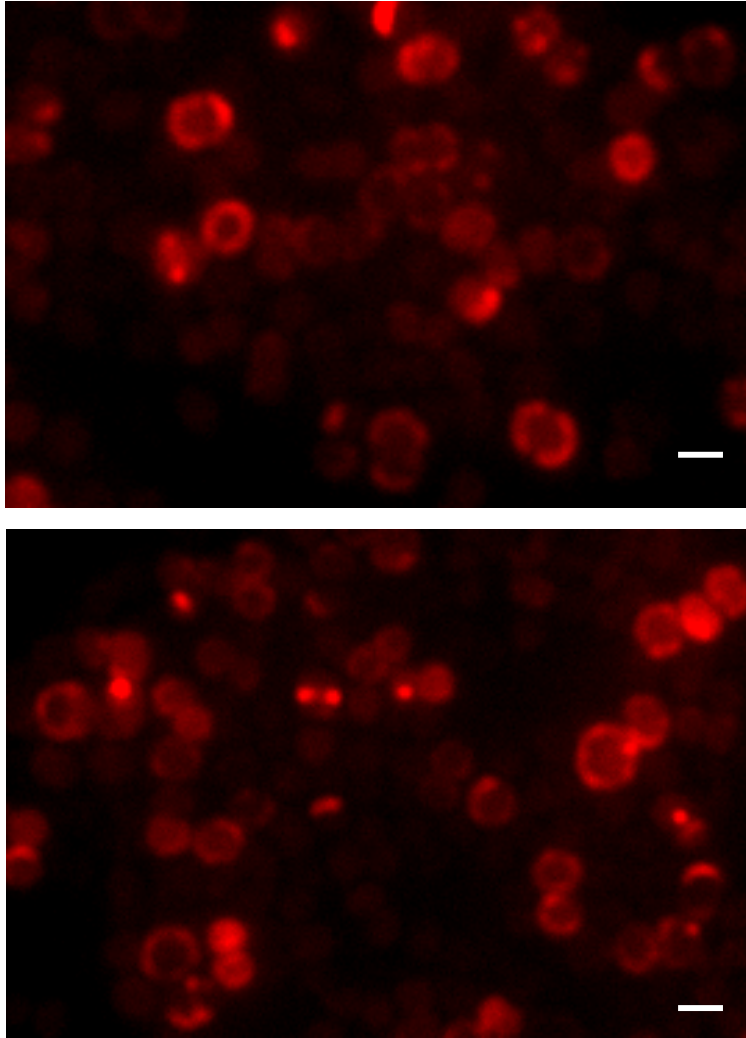

**Figure S6: Microscopic fields of *S. aureus* cells expressing *mars-mreB*.** Fluorescence micrographs of a field of exponentially growing cells labeled with the translational fusion Mars-MreB (false colored in red). The fluorescence signal is mainly localized beneath membranes. *S. aureus* cells divide in sequential orthogonal planes and generates fields of cells positioned at different planes. Scale bar is 1  $\mu\text{m}$ .

1 **Supplementary tables**

2 **Table S1**

| <b>Strain</b> | <b><i>amy</i> locus</b> | <b><i>lac</i> locus</b> |
|---------------|-------------------------|-------------------------|
| RF122         | SAB2338c                | SAB2075c                |
| USA300        | SAUSA300_2400           | SAUSA300_2154           |
| COL           | SACOL2463               | SACOL2185               |
| JH1           | SaurJH1_2531            | SaurJH1_2264            |
| JH9           | SaurJH9_2482            | SaurJH9_2225            |
| MRSA252       | SAR2545                 | SAR2285                 |
| MSSA476       | SAS2347                 | SAS2095                 |
| MW2           | MW2379                  | MW2120                  |
| Mu3           | SAHV_2439               | SAHV_2178               |
| Mu50          | SAV2455                 | SAV2194                 |
| N315          | SA2244                  | SA1996                  |
| NCTC8325      | SAOUSHC_02755           | SAOUSHC_02454           |
| Newman        | NWMN_2354               | NWMN_2098               |

3

4 **Table S1: Identification of *amy* and *lac* loci in the distinct strains of *S. aureus*.**

5 The numeration of the distinct chromosomal genes differs between *S. aureus* strains due to  
6 strain-specific insertion of genetic mobile elements whose genes are subsequently included in the  
7 gene numeration of each particular strain. For better clarification, we have decided to name our  
8 neutral loci as *amy* and *lac* throughout the body of the paper.

9

10 **Table S2: List of strains used in this study.**

11

| <b>Strain</b>           | <b>Genotype</b>                                            | <b>Reference</b> |
|-------------------------|------------------------------------------------------------|------------------|
| <b><i>S. aureus</i></b> |                                                            |                  |
| Newman                  | wild type                                                  | (1)              |
| Newman mreB+            | <i>amy</i> :: P <sub>hyper-spank</sub> - <i>mreB</i>       | This study       |
| Newman marsmreB         | <i>amy</i> :: P <sub>XYL</sub> - <i>marsmreB</i>           | This study       |
| Newman gfp              | <i>amy</i> :: P <sub>hyper-spank</sub> - <i>gfp</i>        | This study       |
| Newman sa1402-gfp       | <i>amy</i> :: P <sub>hyper-spank</sub> - <i>Sa1402-gfp</i> | This study       |
| <b><i>E. coli</i></b>   |                                                            |                  |
| BTH101                  | pKT25-mreB; pUT18C-ftsZ                                    | This study       |
| BTH101                  | pKT25-mreB; pUT18C-pbp2                                    | This study       |
| BTH101                  | pKT25-mreB; pUT18C-pbp3                                    | This study       |
| BTH101                  | pKT25-mreB; pUT18C-mreB                                    | This study       |
| BTH101                  | pKT25-mreB; pUT18C-mreC                                    | This study       |
| BTH101                  | pKT25-mreB; pUT18C-mreD                                    | This study       |
| BTH101                  | pKT25-mreB; pUT18C-ezrA                                    | This study       |
| BTH101                  | pKT25-mreB; pUT18C-ftsA                                    | This study       |
| BTH101                  | pUT18C-mreB; pKT25-pbp2                                    | This study       |
| BTH101                  | pUT18C-mreB; pKT25-pbp3                                    | This study       |
| BTH101                  | pUT18C-mreB; pKT25-mreC                                    | This study       |
| BTH101                  | pUT18C-mreB; pKT25-mreD                                    | This study       |

|                    |                          |            |
|--------------------|--------------------------|------------|
| BTH101             | pUT18C-mreB; pKT25-ftsZ  | This study |
| BTH101             | pUT18C-mreB; pKNT25-ezrA | This study |
| BTH101             | pUT18C-mreB; pKNT25-ftsA | This study |
| <b>B. subtilis</b> |                          |            |
| Wild type 168      |                          | (2)        |

12

13 **Table S2:** List of strains used in this study.

14

15 **Table S3**

16

| Plasmid                    | Features                                                                  | Reference  |
|----------------------------|---------------------------------------------------------------------------|------------|
| pDR111                     | <i>amyE</i> :: P <sub>hyper-spank</sub> - <i>spc</i>                      | (3)        |
| pSG1154                    | <i>bla amyE</i> :: <i>spc</i> P <sub>XYL</sub> <i>gfpmut1</i>             | (4)        |
| pSW-1                      | <i>bla</i> , <i>oriRK2</i> , <i>xyIS</i> , P <sub>m</sub> → <i>I-sceI</i> | (5)        |
| pMAD                       | <i>bla</i> , Ori pBR325, <i>ermC</i> , <i>bgaB</i> , <i>pclpB</i>         | (6)        |
| pCell                      | <i>lacB</i> (Nwmn 2098)::MCS                                              | This study |
| pLac                       | <i>cell</i> (Nwmn 2354)::MCS                                              | This study |
| pSce                       | P <sub>hyper-spank</sub> - <i>I-sceI</i>                                  | This study |
| pAmy <sub>IPTG</sub>       | <i>amy</i> :: P <sub>hyper-spank</sub>                                    | This study |
| pAmy <sub>XYL</sub>        | <i>amy</i> :: P <sub>XYL</sub>                                            | This study |
| pAmy <sub>YFP</sub>        | <i>amy</i> :: YFP                                                         | This study |
| pAmy <sub>MARS</sub>       | <i>amy</i> :: Mars                                                        | This study |
| pAmy <sub>HIS</sub>        | <i>amy</i> :: His(6x)                                                     | This study |
| pLaC <sub>IPTG</sub>       | <i>lac</i> :: P <sub>hyper-spank</sub>                                    | This study |
| pLaC <sub>XYL</sub>        | <i>lac</i> :: P <sub>XYL</sub>                                            | This study |
| pLaC <sub>YFP</sub>        | <i>lac</i> :: YFP                                                         | This study |
| pLaC <sub>MARS</sub>       | <i>lac</i> :: MARS                                                        | This study |
| pLaC <sub>HIS</sub>        | <i>lac</i> :: His(6x)                                                     | This study |
| pCell <sub>IPTG</sub> MreB | <i>amy</i> :: P <sub>hyper-spank</sub> - <i>mreB</i>                      | This study |
| pCell <sub>MARS</sub> MreB | <i>amy</i> :: P <sub>XYL</sub> - <i>Mars</i> - <i>mreB</i>                | This study |
| pKT25-mreB                 | <i>km</i> , T25 domain in frame with <i>mreB</i> in C-terminal            | This study |
| pKT25-pbp2                 | <i>km</i> , T25 domain in frame with <i>pbp2</i> in C-terminal            | This study |
| pKT25-pbp3                 | <i>km</i> , T25 domain in frame with <i>pbp3</i> in C-terminal            | This study |
| pKT25-mreC                 | <i>km</i> , T25 domain in frame with <i>mreC</i> in C-terminal            | This study |
| pKT25-mreD                 | <i>km</i> , T25 domain in frame with <i>mreD</i> in C-terminal            | This study |
| pKT25-ftsZ                 | <i>km</i> , T25 domain in frame with <i>ftsZ</i> in C-terminal            | This study |
| pKNT25-ezrA                | <i>km</i> , T25 domain in frame with <i>ezrA</i> in N-terminal            | This study |
| pKNT25-ftsA                | <i>km</i> , T25 domain in frame with <i>ftsA</i> in N-terminal            | This study |
| pUT18-ezrA                 | <i>Amp</i> , T18 domain in frame with <i>ezrA</i> in N-terminal           | This study |
| pUT18-ftsA                 | <i>Amp</i> , T18 domain in frame with <i>ftsA</i> in N-terminal           | This study |
| pUT18C-mreB                | <i>Amp</i> , T18 domain in frame with <i>mreB</i> in C-terminal           | This study |
| pUT18C-pbp2                | <i>Amp</i> , T18 domain in frame with <i>pbp2</i> in C-terminal           | This study |
| pUT18C-pbp3                | <i>Amp</i> , T18 domain in frame with <i>pbp3</i> in C-terminal           | This study |
| pUT18C-mreC                | <i>Amp</i> , T18 domain in frame with <i>mreC</i> in C-terminal           | This study |
| pUT18C-mreD                | <i>Amp</i> , T18 domain in frame with <i>mreD</i> in C-terminal           | This study |
| pUT18C-ftsZ                | <i>Amp</i> , T18 domain in frame with <i>ftsZ</i> in C-terminal           | This study |

17

18 **Table S3:** List of plasmids used in this study.

19

20



21 Table S4

| Name      | Sequence                                                |
|-----------|---------------------------------------------------------|
| AYG63     | TTTTAGATCTTTTGAAAAATTAGAGCCTAAATATT                     |
| AYG104    | GAATTCTCGAGTCGACCATGGCTAGCGGATCCAGCTAATGCACAGCCATAG     |
| AYG105    | GGATCCGCTAGCCATGGTTCGACTCGAGAATTCAGGTATTAACGTTTAAAAG    |
| AYG66     | TTTTGCCGGCTGCATCAAATAACTGATTCGTTG                       |
| AYG59B    | TTTTGCCATGGCTTTTCTCAAGATTTTCATAACC                      |
| AYG60B    | TGAATTCGGATCCGTCGACCCGGGCTCGAGCTAGCGTCATATCACGTACTAGTGC |
| AYG61B    | GCTAGCTCGAGCCCGGGTCGACGGATCCGAATTCAGAAAAATGGGACAGAGGCG  |
| AYG62     | TTTTGCCGGCTACACTTATTGTCCGAATATTAC                       |
| AYG147    | TTTTTGTGACAAGGAGGGTGAATGAATCGGAC                        |
| AYG148    | TTTTTGCTAGCCCTAGCGTTTGCAATGCACC                         |
| AYG149    | TAGGGATAACAGGGTAATACGTTGCTCGAGGGTAAATG                  |
| AYG151N   | TTTTGCTCTTCCAGCAACTCACATTAATTGCGTTG                     |
| AYG150    | TTTTGCTCTTCCGCTTAGGGATAACAGGGTAATACG                    |
| cm fwd    | CTTGATAATAAGGGTAACTATTGCC                               |
| cm rev    | GGGTAAGTACGCTCGCCGGTCCACG                               |
| lac5 down | CTTGATAATAAGGGTAACTATTGCCGTAATTTTCTCCTTAG               |
| lac3 up   | GGGTAAGTACGCTCGCCGGTCCACGGACACATATGATTTTAAAC            |
| amy5 down | CTTGATAATAAGGGTAACTATTGCCATTCATCCTCCTGTATTTT            |
| amy3 up   | GGGTAAGTACGCTCGCCGGTCCACGAAATCCATAAATAATAAAG            |
| mreBfwd   | AAAAGTCGACTAAGGAGGAAGAAAGGAAGATACATACATA                |
| mreBrev   | AAAAGCTAGCCTCTTCTATTGAACTCCCG                           |
| AYG 207   | TTTTTACTAGTCCTCTTCTATTGAACTCCCG                         |
| AYG 213   | CATTCAACAGGTGCAGGAATGTTTGGAAATTGGTGC                    |
| AYG 211   | TTTTTCTCGAGTAAGGAGGTTTAAATGGCATCATCAGAAGATG             |
| AYG 212   | GCACCAATTCCAAACATTCTGCACCTGTTGAATG                      |
| AYG 165   | TTTTTGGATCCACGATATTCACGGTTTACCC                         |
| AYG 166   | TTTTTGCTAGCGATAATTCGCGGCCGCTCTAG                        |
| AYG173    | TTTTTGCTAGCATATCAAGCTTATCGATACCG                        |
| GK142     | AAAAGTCGACATGGCATCATCAGAAGATGTT                         |
| GK143     | TTTTGCTAGCTTATCCTGCACCTGTTGAATG                         |
| JC86      | TTTTTGGATCCTTATCCTGCACCTGTTGAATG                        |
| GK139     | AAAAGTCGACATGGACAAAGACTGCG                              |
| GK140     | TTTTTTGCTAGCTTAGCCTGCAGGACCC                            |
| GK141     | TTTTTTGGATCCTTAGCCTGCAGGACCC                            |
| GK144     | CTTAGTGATGATGATGATGATGATGGTTCGACGGATCCGAATTC            |
| GK146     | GATCCTTAGTGATGATGATGATGATGATGGTTCGACTCGAGAATTC          |
| GK145     | GACCATCATCATCATCATCACTAAGCTAGCGTCATATCACG               |
| AYG100    | ATCCGTCGACTACATAAGGAGGAACTACTATGAG                      |
| AYG101    | CTCAGGATCCTTATTTGTATAGTTC                               |
| AYG101b   | TTTTTGCTAGCTTATTTGTATAGTTCATCCATGC                      |
| GK38      | AGCAAAGAATTCCGTATTAAGATATAGG                            |
| GK19      | ATTTATAAGCTTCACAATTCACCTCGC                             |
| GK2       | AAAAAAAAGCTTATGTTTAGTTTAAAG                             |
| GK3       | CTTCTCCTTTACTCATATGTTTCAAGGTGACTCA                      |
| GK4       | TGAGTCACCTGAACA TATGAGTAAAGGAGAAG                       |
| GK201     | TCTAGAGGATCCATTTGGAATTGGTGC                             |
| GK202     | ACGGCCGAATTCTTATCTAGTTTTCCCTTTG                         |
| GK203     | CGCCACTGCAGAACGGAAAACAAAGGATC                           |
| GK204     | ACCCGGGGATCCTTAGTTGAATATACCTG                           |
| GK205     | ACGCCACTGCAGATTA AAAAGACTAAAAG                          |
| GK206     | ACCCGGGGATCCTTATTTGTCTTTGTC                             |

|       |                                    |
|-------|------------------------------------|
| GK207 | ACGCCACTGCAGGCTTAAGTTTTTTAAAAATAAC |
| GK208 | ACCCGGGGATCCTTATTTATCCCTGCTTTCATC  |
| GK209 | ACGCCACTGCAGACGTACACTGTATTATTTTTTG |
| GK210 | ACCCGGGGATCCTTACCATTGACGACGTTTC    |
| GK211 | CTGCAGGTGCACATTAGAATTTGAACAAGG     |
| GK212 | ACCCGGGGATCCTTAACGTCTTGTTCTTCTTG   |
| GK213 | CGCCAAAGCTTATGGAAGAACATTACTACG     |
| GK214 | ACCCGGGGATCCTCAAATAGAGATTTTCATTAG  |
| GK215 | CGCCAGCATGCATGGTGTATATATCATTTTGG   |
| GK216 | ACCCGGGGATCCTGCTTAATAACTTCTTC      |
| GK235 | AAAAAAGCTTATGTTTGGAATTGGTGC        |
| GK236 | AAAAGGATCCCTAGTTTTCCCTTTGAAAAG     |
| GK237 | AAAAGGATCCCTAGTTTTCCCTTTGAAAAG     |
| GK238 | AAAAGGATCCCTAGTTTTCCCTTTGAAAAG     |
| GK239 | AAAAAAGCTTATGCTTAAGTTTTTTAAA       |
| GK240 | AAAAGGATCCCTATCCCTGCTTTCATC        |
| GK241 | AAAAAAGCTTATGCGTACACTGTATTATTT     |
| GK242 | AAAAGGATCCCATTGACGACGTTTCATGTC     |
| GK243 | AAAAGGATCCCATTGACGACGTTTCATGTC     |
| GK244 | AAAAGGATCCCATTGACGACGTTTCATGTC     |
| GK245 | AAAAGGATCCCATTGACGACGTTTCATGTC     |

22

23 **Table S4:** List of primers used in this study.

24

25

26 **References**

27

28 1. **Lipinski B, Hawiger J, Jeljaszewicz J.** 1967. Staphylococcal clumping with  
29 soluble fibrin monomer complexes. *J Exp Med* **126**:979-988.

30 2. **Burkholder PR, Giles NH, Jr.** 1947. Induced biochemical mutations in *Bacillus*  
31 *subtilis*. *Am J Bot* **34**:345-348.

32 3. **Britton RA, Eichenberger P, Gonzalez-Pastor JE, Fawcett P, Monson R,**  
33 **Losick R, Grossman AD.** 2002. Genome-wide analysis of the stationary-phase  
34 sigma factor (sigma-H) regulon of *Bacillus subtilis*. *J Bacteriol* **184**:4881-4890.

35 4. **Meile JC, Wu LJ, Ehrlich SD, Errington J, Noirot P.** 2006. Systematic  
36 localisation of proteins fused to the green fluorescent protein in *Bacillus subtilis*:  
37 identification of new proteins at the DNA replication factory. *Proteomics* **6**:2135-  
38 2146.

39 5. **Martinez-Garcia E, de Lorenzo V.** 2011. Engineering multiple genomic  
40 deletions in Gram-negative bacteria: analysis of the multi-resistant antibiotic  
41 profile of *Pseudomonas putida* KT2440. *Environ Microbiol* **13**:2702-2716.

42 6. **Arnaud M, Chastanet A, Debarbouille M.** 2004. New vector for efficient allelic  
43 replacement in naturally nontransformable, low-GC-content, gram-positive  
44 bacteria. *Appl Environ Microbiol* **70**:6887-6891.

45

46

47
